# Supplementary material for: MAD2L2 inhibits colorectal cancer growth by promoting NCOA3 ubiquitination and degradation
Source: PubMed Central journal article supplement (PMC5830628; doi:10.1002/1878-0261.12173), 2018-02-13

# Figure S1

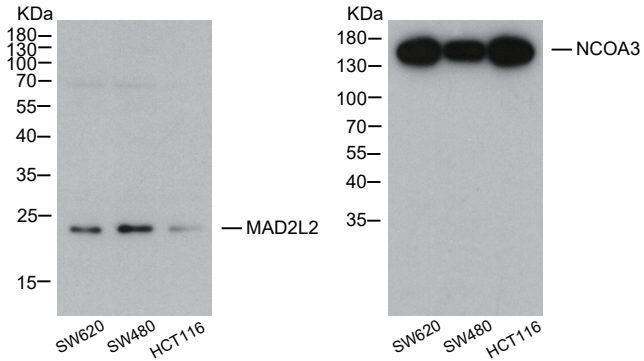

Supplement: MOL2-12-391-s001.pdf [file MOL2-12-391-s001.pdf]
